# Supplementary figures and images for: Impact of select actionable genomic alterations on efficacy of neoadjuvant immunotherapy in resectable non-small cell lung cancer
Source: PubMed Central journal article supplement — J Immunother Cancer. 2024 Oct 23;12(10):e009677. doi: 10.1136/jitc-2024-009677 (PMC11499765; doi:10.1136/jitc-2024-009677), 2024-10-23

**A**

TF No TF  
 No MPR ○ ○  
 MPR ● ●

Odds ratio, 3.38 (95% CI: 0.35, 32.6)

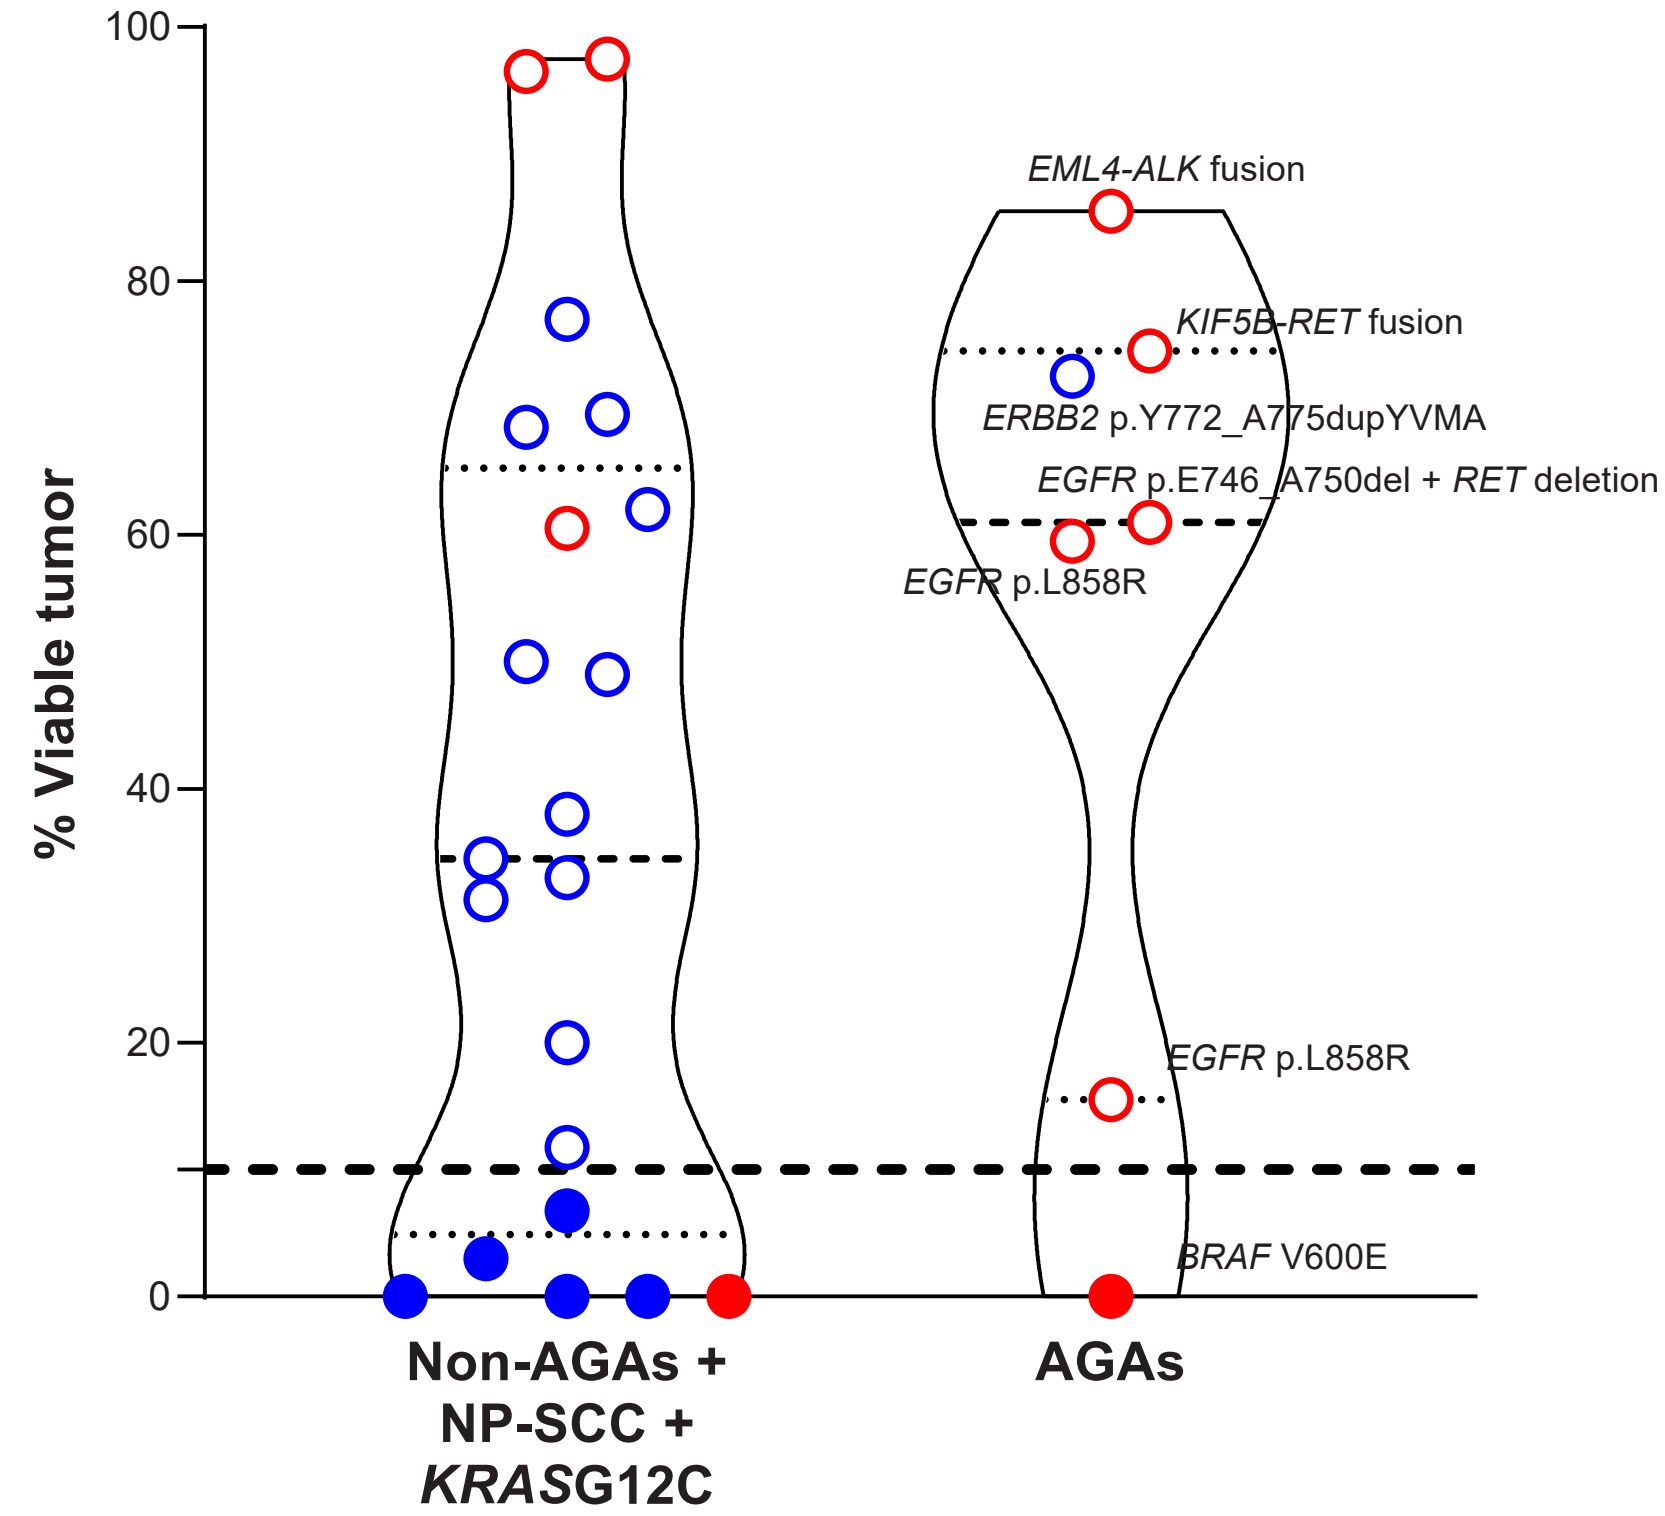**B**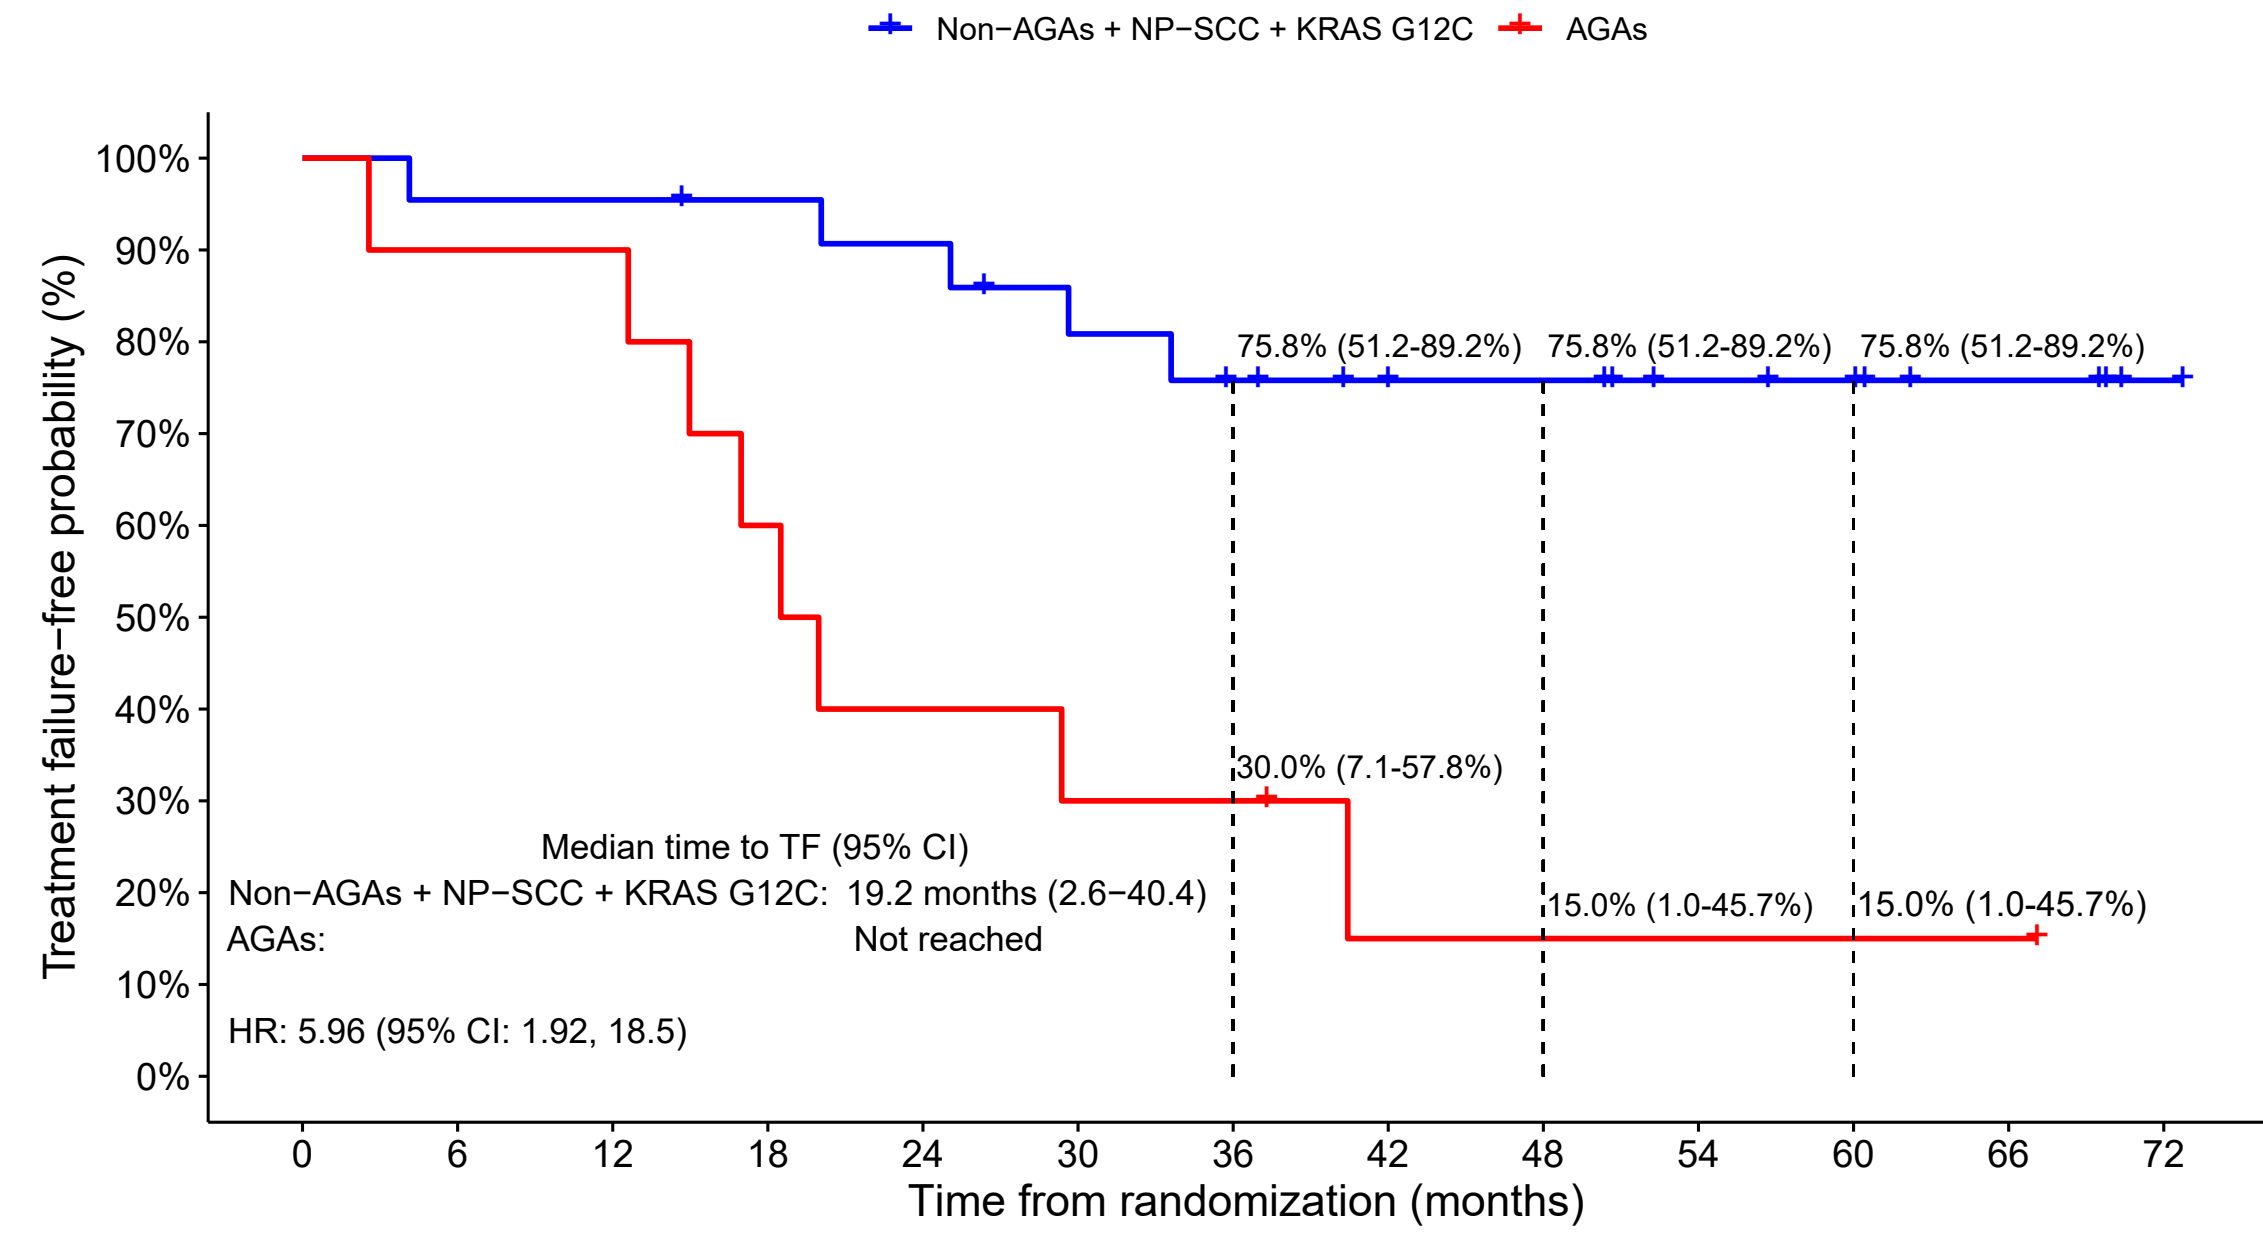

Number at risk

|   |    |    |    |    |    |    |    |    |    |   |   |   |   |
|---|----|----|----|----|----|----|----|----|----|---|---|---|---|
| — | 22 | 21 | 21 | 20 | 19 | 16 | 14 | 12 | 11 | 8 | 7 | 4 | 1 |
| — | 10 | 9  | 9  | 6  | 4  | 3  | 3  | 1  | 1  | 1 | 1 | 1 | 0 |

Supplement: jitc-12-10-s001.pdf [file jitc-12-10-s001.pdf]
